# Supplementary material for: Compromised MPS1 Activity Induces Multipolar Spindle Formation in Oocytes From Aged Mares: Establishing the Horse as a Natural Animal Model to Study Age-Induced Oocyte Meiotic Spindle Instability
Source: PubMed Central journal article supplement (PMC8136435; doi:10.3389/fcell.2021.657366), 2021-05-06
Supplement: Table_1.pdf [file Table_1.pdf]

| Maternal age (years)                                                   |                     | ≤14               |                    |                          | ≥16               |                     |                          |
|------------------------------------------------------------------------|---------------------|-------------------|--------------------|--------------------------|-------------------|---------------------|--------------------------|
| N. of oocytes with bipolar spindles showing misaligned chromosomes (%) |                     | Mild (≤ 5 chrom.) | Severe (>5 chrom.) | Total                    | Mild (≤ 5 chrom.) | Severe (> 5 chrom.) | Total                    |
| Treatment                                                              | Control             | 1                 | 0                  | 1/22 (5%) <sup>a</sup>   | 8                 | 0                   | 8/18 (44%) <sup>b</sup>  |
|                                                                        | 0nM MPS1i/0μM AURKi | 3                 | 0                  | 0/20 (0%) <sup>a</sup>   | 5                 | 0                   | 9/16 (56%) <sup>b</sup>  |
|                                                                        | 200nM MPS1i         | 0                 | 0                  | 0/18 (0%) <sup>a</sup>   | 0                 | 6                   | 4/14 (28%) <sup>b</sup>  |
|                                                                        | 500nM MPS1i         | 0                 | 7                  | 9/40 (23%) <sup>a</sup>  | 0                 | 8                   | 10/14 (71%) <sup>b</sup> |
|                                                                        | 5μM AURKi           | 1                 | 0                  | 1/11 (9%) <sup>ab</sup>  | 4                 | 0                   | 4/9 (44%) <sup>ab</sup>  |
|                                                                        | 10μM AURKi          | 3                 | 0                  | 8/21 (38%) <sup>ab</sup> | 0                 | 0                   | 0/11 (52%) <sup>ab</sup> |
